# Supplementary material
Source: PubMed Central journal article supplement (PMC6219625)
Supplement: NIHMS1509043-supplement-5.pdf [file NIHMS1509043-supplement-5.pdf]

**List of Supplementary Files.**

**Supplementary Table 1.** Antibodies use in immunoblot analysis.

**Supplementary Figure 1.** miRNA expression in the livers of mice fed OEP-NF.

**Supplementary Figure 2.** Power-Doppler analysis of mitral valve in mice fed OEP-NF.

**Supplementary Figure 3.** Ultrasonography scans of mice fed control (upper) and OEP-NF (bottom) diets.

**Supplementary Figure 4.** Immunoblot analysis of the left ventricular levels of selected proteins.

**Supplementary Video 1.** Ultrasonography of a mouse fed control diet.

**Supplementary Video 2.** Ultrasonography of a mouse fed OEP-NF diet.
