# Supplementary material
Source: PubMed Central journal article supplement (PMC6219625)

UAMS Marjan Boerma MS-400

**Application Preset**  
Cardiology Cardiac

**Transmit**  
Frequency 30 MHz  
Power 100 %

**Acquisition**  
Gain 27 dB

**Display**  
Dynamic Range 60 dB  
Display Map C5  
Sweep Speed 1200 Hz  
Brightness 50  
Contrast 50

**Gate**  
Depth 11.04 mm  
Length 7.8 mm  
Gate-Angle 0 deg

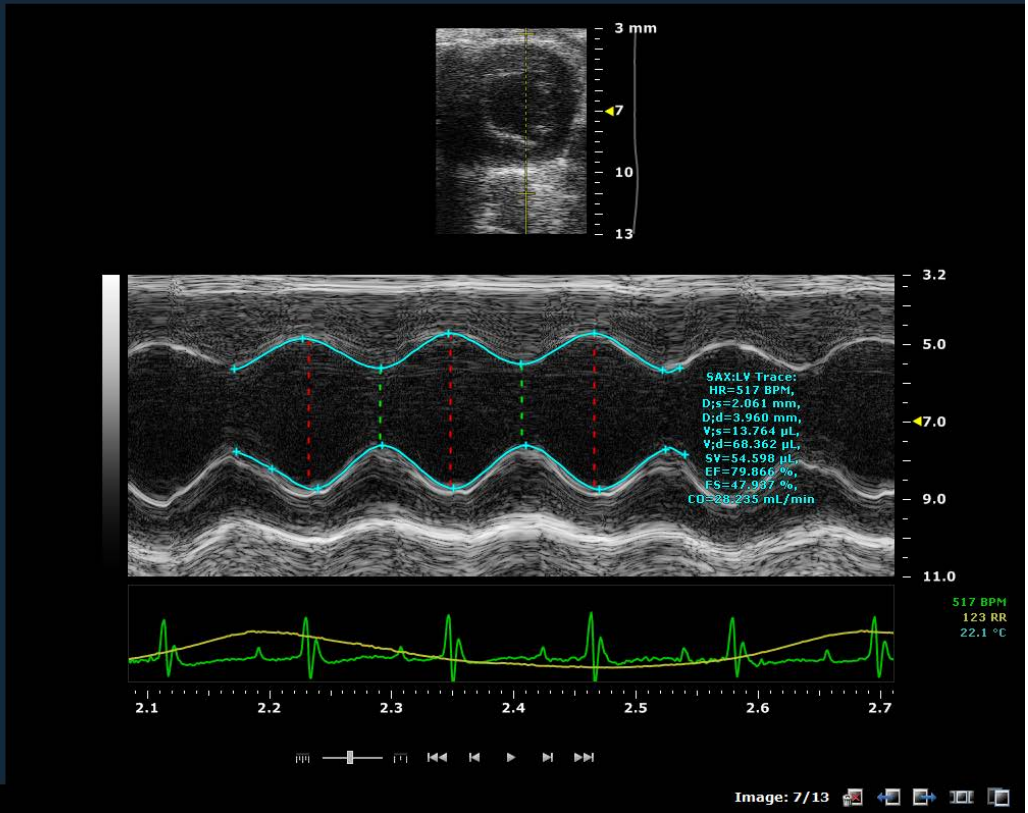

UAMS Marjan Boerma MS-400

**Application Preset**  
Cardiology Cardiac

**Transmit**  
Frequency 30 MHz  
Power 100 %

**Acquisition**  
Gain 27 dB

**Display**  
Dynamic Range 60 dB  
Display Map C5  
Sweep Speed 1200 Hz  
Brightness 50  
Contrast 50

**Gate**  
Depth 10.9 mm  
Length 7.8 mm  
Gate-Angle 0 deg

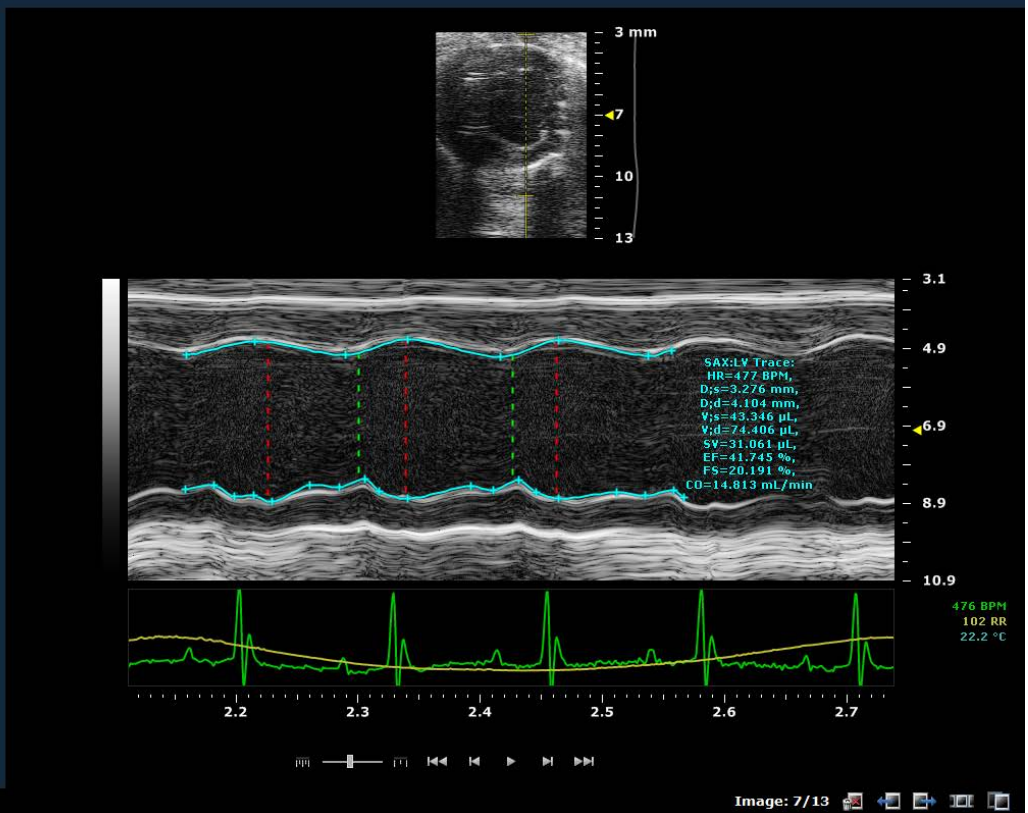

Supplement: NIHMS1509043-supplement-8.pdf [file NIHMS1509043-supplement-8.pdf]
