# Supplementary material
Source: PubMed Central journal article supplement (PMC6219625)
Supplement: NIHMS1509043-supplement-10.pdf [file NIHMS1509043-supplement-10.pdf]

### Supplementary Table 1. Antibodies used in immunoblot analysis.

| Target   | Host   | Company and catalog number                                                  | Dilution |
|----------|--------|-----------------------------------------------------------------------------|----------|
| 4-HNE    | Rabbit | Gift from Dr. Sharda P. Singh, Texas Tech University Health Sciences Center | 1:10,000 |
| Catalase | Rabbit | Santa Cruz (Sc-50508                                                        | 1:5,000  |
| CD2      | Rabbit | Santa Cruz (sc-28807                                                        | 1:1,000  |
| CD68     | Rabbit | Santa Cruz (Sc-9139                                                         | 1:1,000  |
| GAPDH    | Mouse  | Santa Cruz (sc-32233                                                        | 1:20,000 |
| GPx1     | Rabbit | Santa Cruz (sc-30147                                                        | 1:1,000  |
| SOD2     | Rabbit | Santa Cruz (sc-30080                                                        | 1:40,000 |
