# Supplementary material
Source: PubMed Central journal article supplement (PMC6219625)

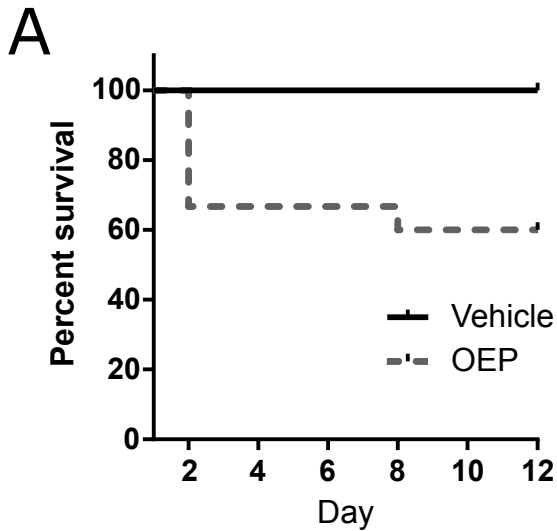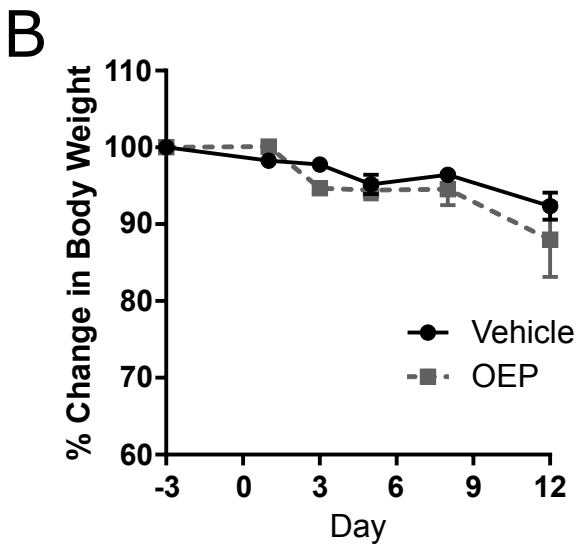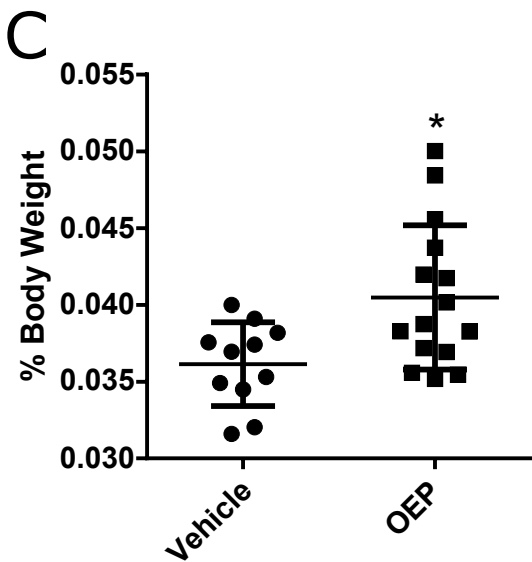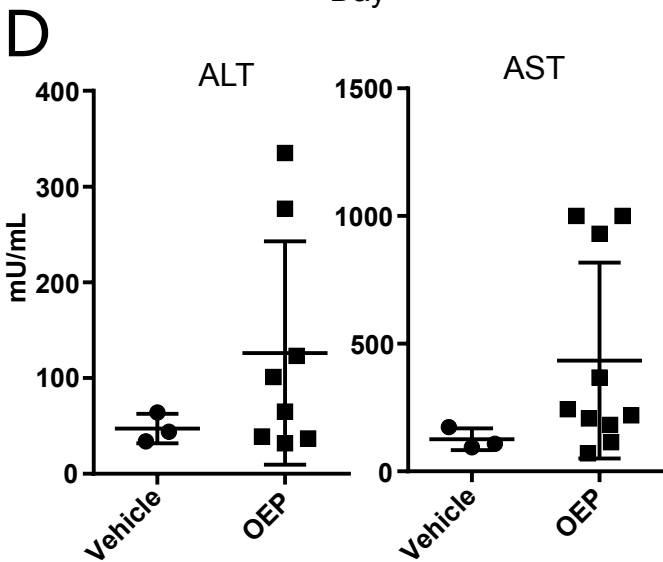

Supplement: NIHMS1509043-supplement-1.pdf [file NIHMS1509043-supplement-1.pdf]

**A***Avpr1a*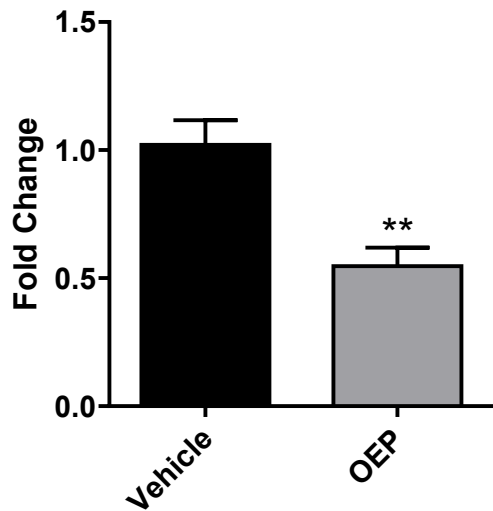**B***Lgr5*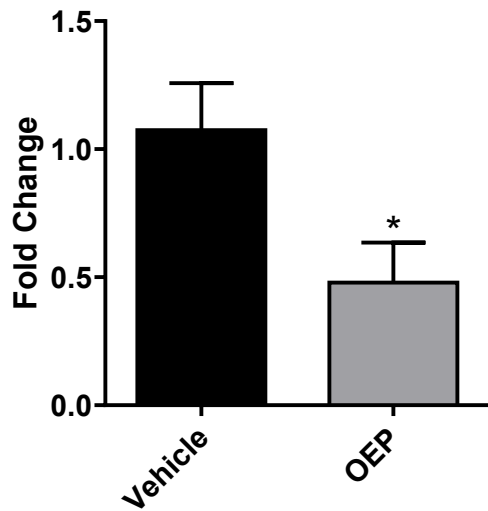**C***Skil*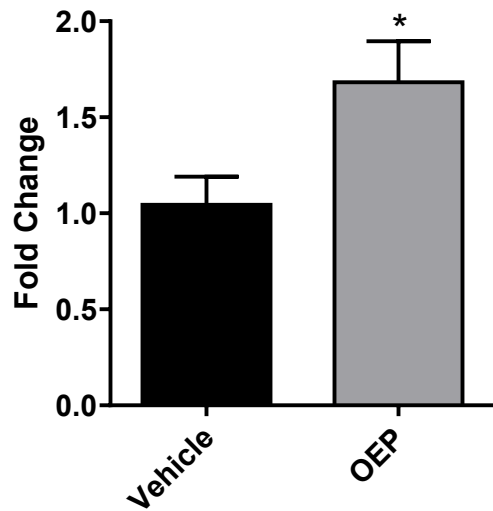**D**

miR-101a

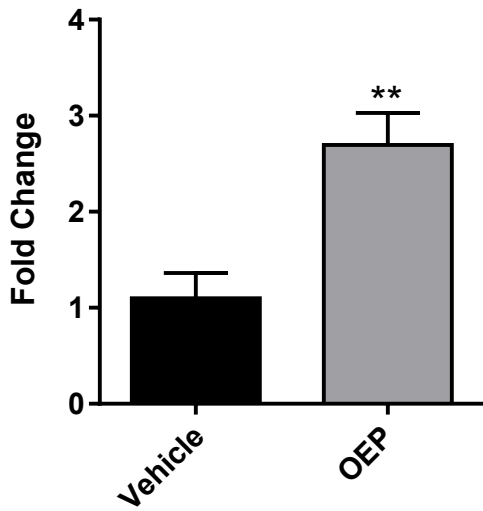

Supplement: NIHMS1509043-supplement-2.pdf [file NIHMS1509043-supplement-2.pdf]

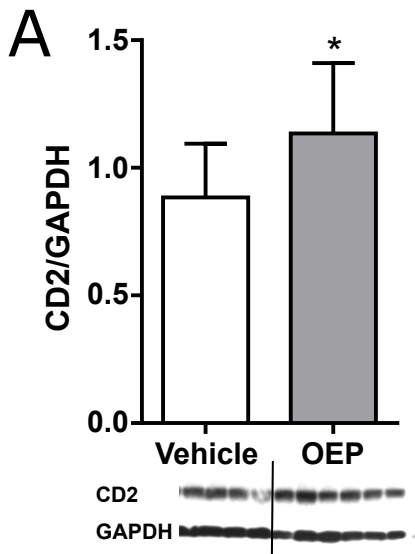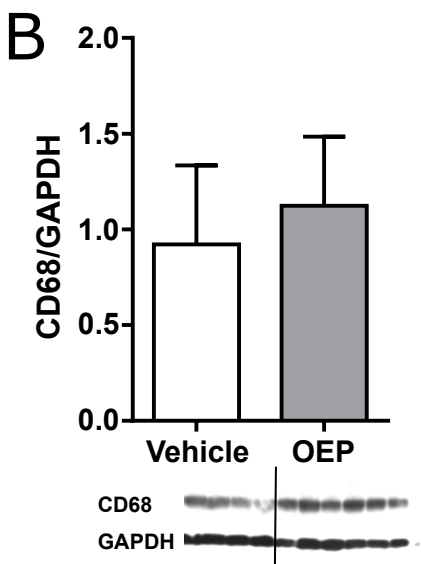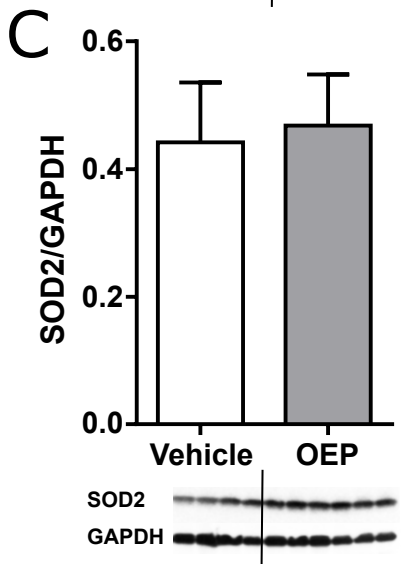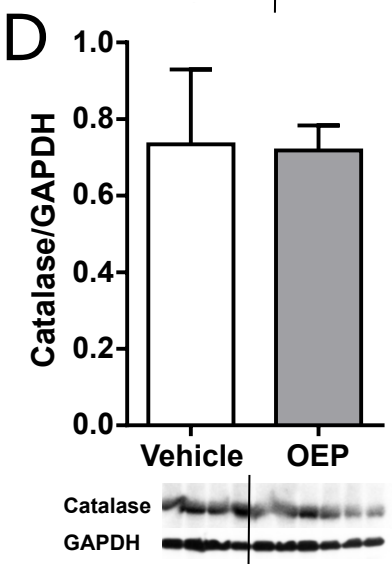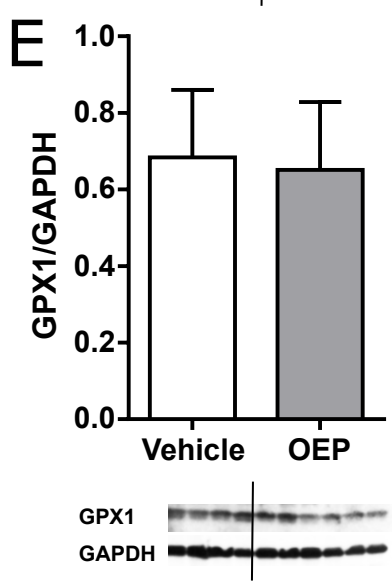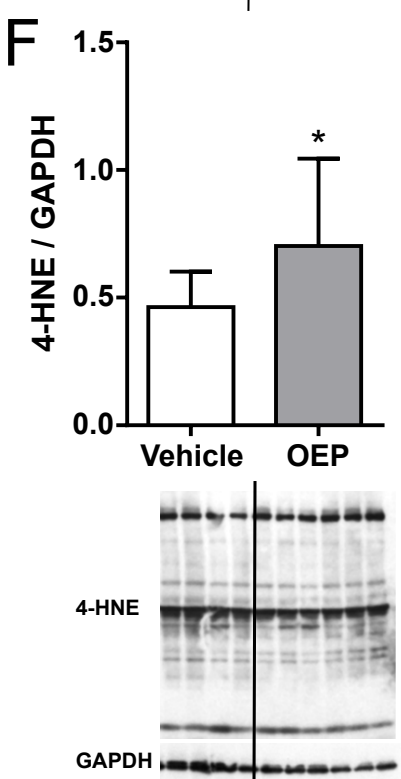

Supplement: NIHMS1509043-supplement-3.pdf [file NIHMS1509043-supplement-3.pdf]

**A**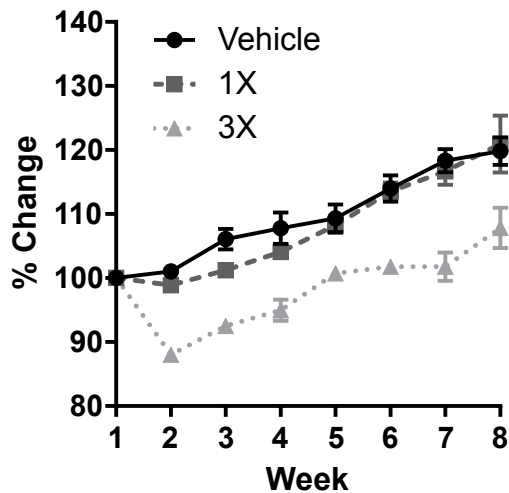**B**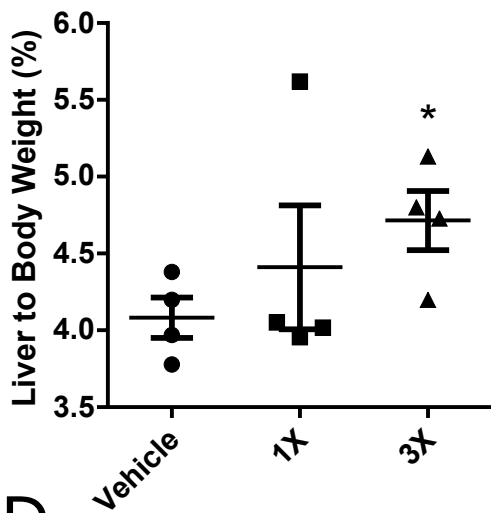**C**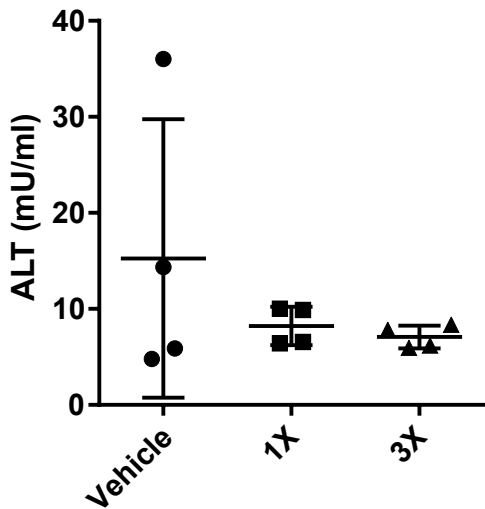**D**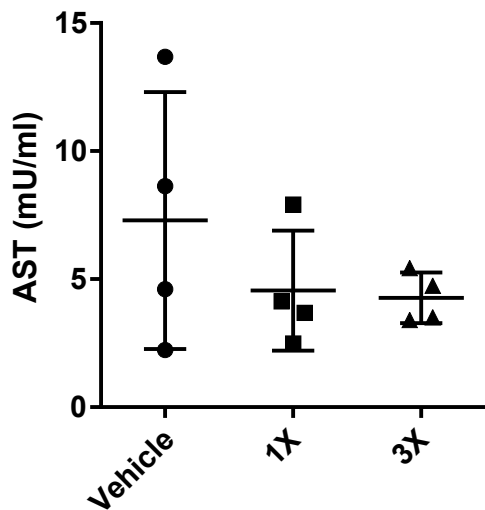

Supplement: NIHMS1509043-supplement-4.pdf [file NIHMS1509043-supplement-4.pdf]

**miR-122**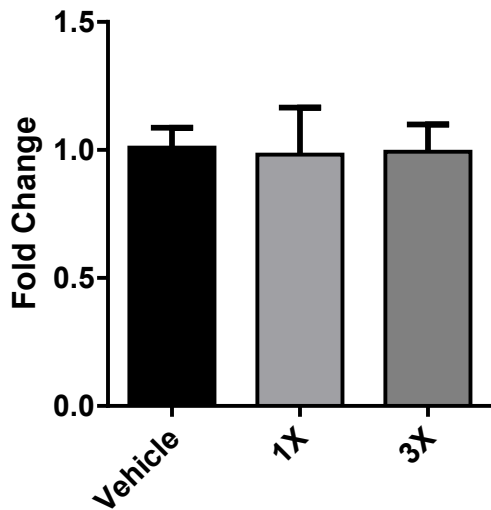**miR-21**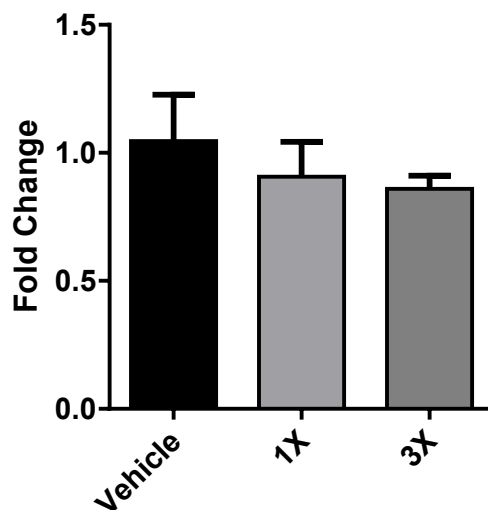**miR-29a**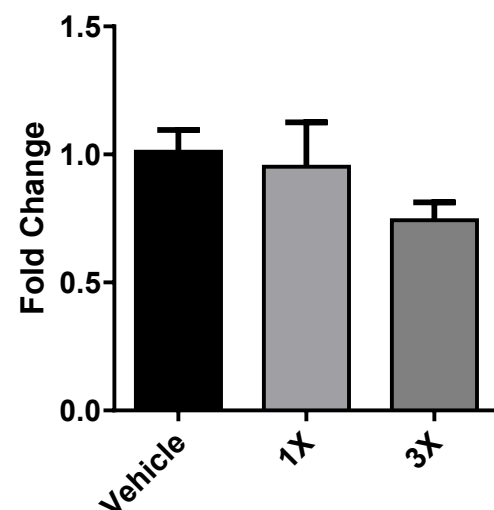**miR-101a**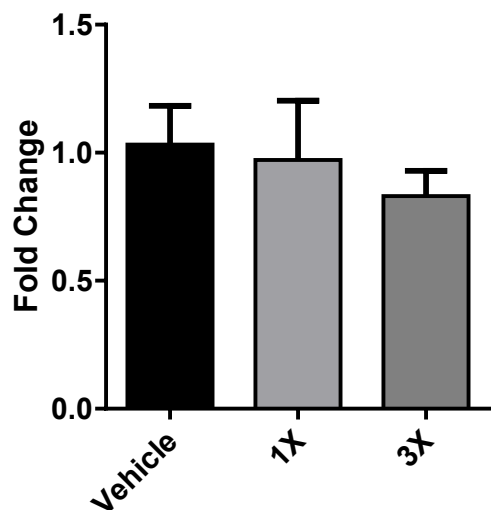**miR-125b**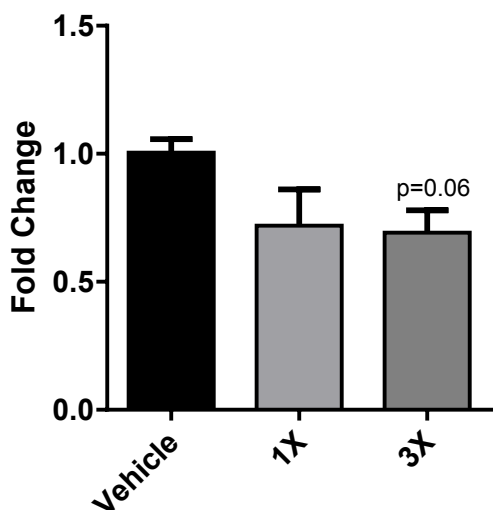**miR-146a**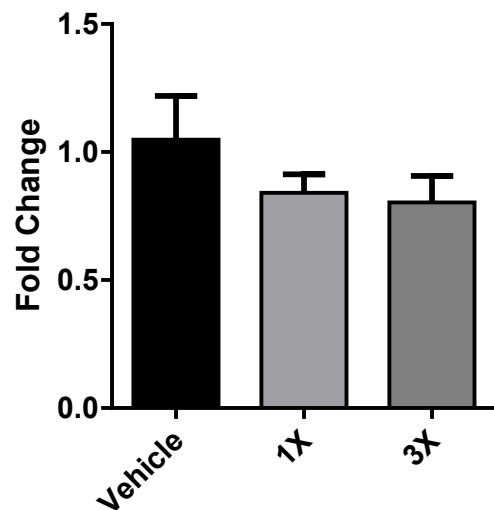**miR-192**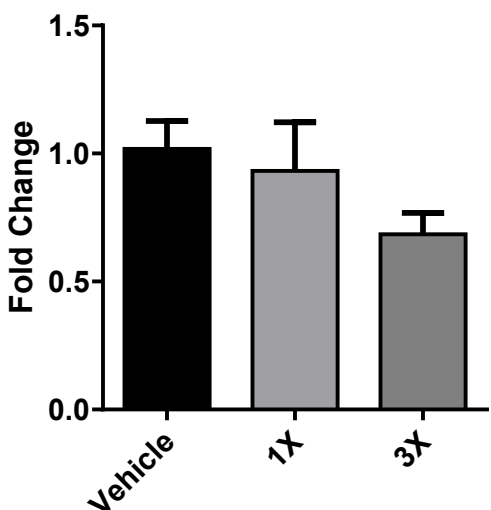**miR-193a**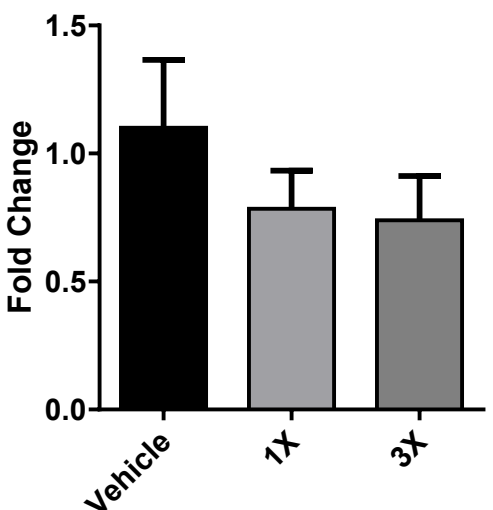**miR-483**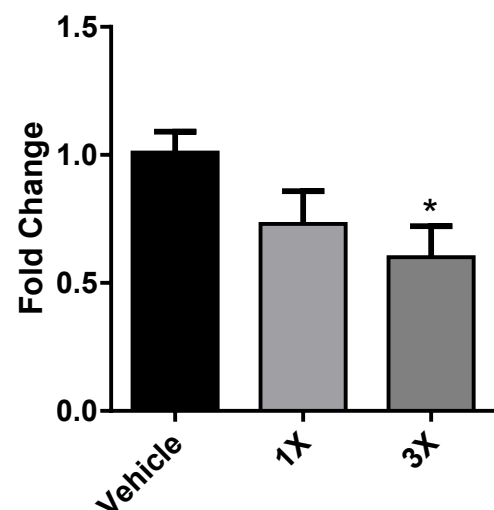

Supplement: NIHMS1509043-supplement-6.pdf [file NIHMS1509043-supplement-6.pdf]

## Supplemental Figure 2.

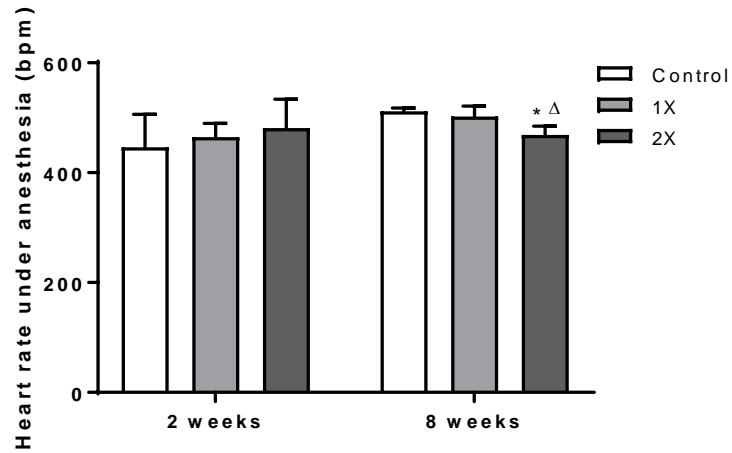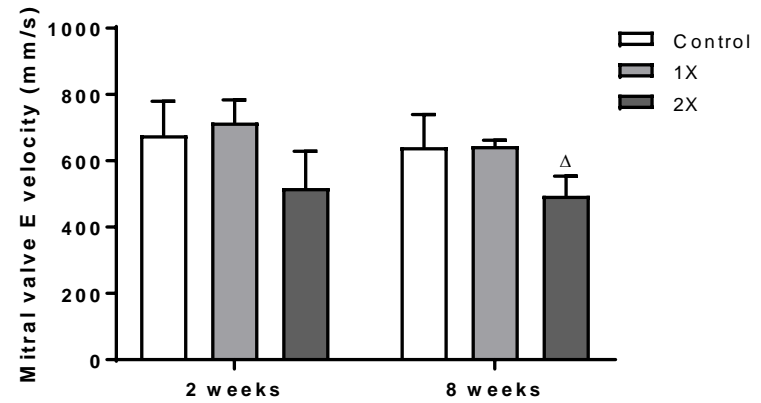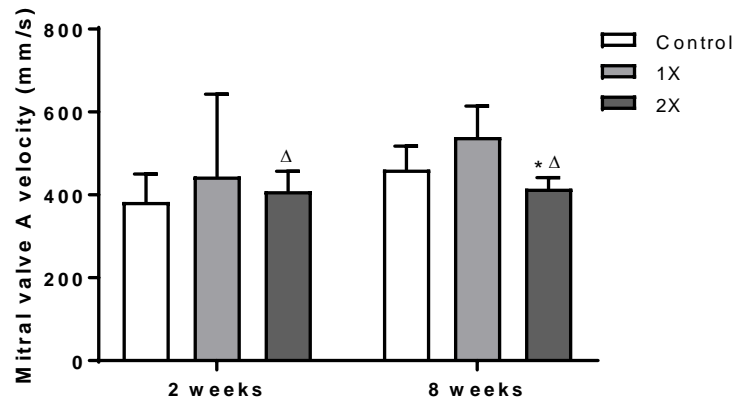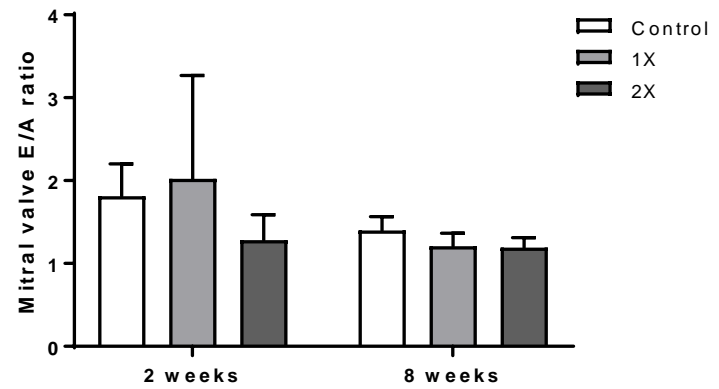

Supplement: NIHMS1509043-supplement-7.pdf [file NIHMS1509043-supplement-7.pdf]

## Supplemental Figure 4.

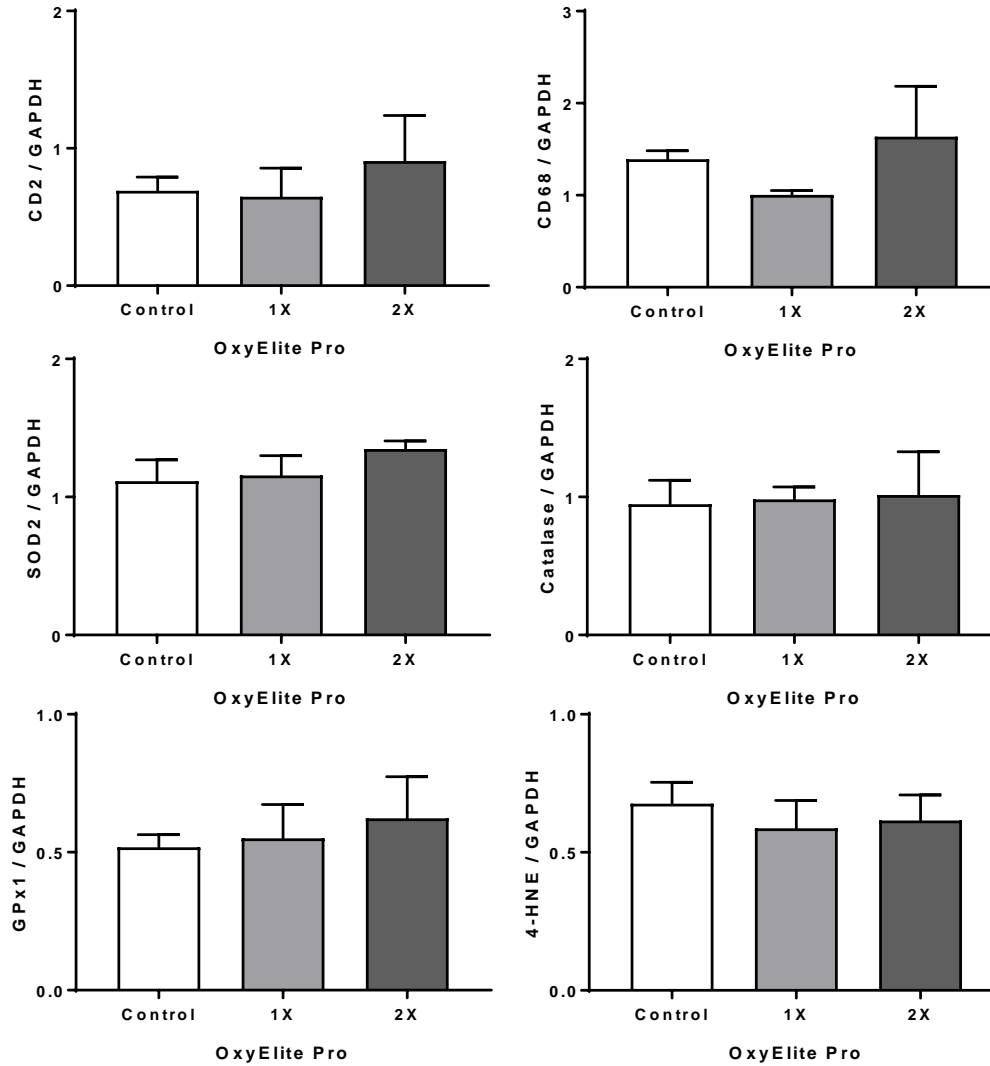

Supplement: NIHMS1509043-supplement-9.pdf [file NIHMS1509043-supplement-9.pdf]
